# Supplementary material for: A quantum Monte Carlo study on electron correlation effects in small aluminum hydride clusters
Source: Royal Society of Chemistry journal article supplement (doi:10.1039/c4nj01746c), 2015-01-01
Supplement: c4nj01746c1.pdf [file c4nj01746c1.pdf]

Supplemental material (cartesian coordinates of all studied clusters in Angstrom) for:  
Quantum Monte Carlo study on electron correlation effects in small aluminum  
hydride clusters

J. Higino Damasceno Jr., J.N. Teixeira Rabelo and Ladir Cândido

Aluminum clusters

**Al<sub>2</sub> (Singlet)**

Al -0.008315 -0.765020 -0.533412  
Al 0.015697 1.855467 -0.351997

**Al<sub>4</sub> (Singlet)**

Al -4.468992 -1.398344 -0.598850  
Al -4.175428 1.291267 0.620891  
Al -6.779719 0.883245 1.144442  
Al -5.676123 1.257385 -1.273258

**Al<sub>6</sub> (Singlet)**

Al 1.898485 0.004080 0.540821  
Al -0.600613 -1.494170 1.147565  
Al -1.898018 -0.003856 -0.540984  
Al 0.600171 1.494492 -1.147985  
Al 0.607918 -1.488135 -1.152211  
Al -0.607840 1.487625 1.152025

**Al<sub>7</sub> (Doublet)**

Al 0.526165 0.000741 1.699623  
Al -1.504965 1.372396 0.792266  
Al -1.505760 0.000336 -1.585204  
Al 0.526263 -1.469550 -0.849516  
Al -1.503847 -1.372936 0.792575  
Al 0.526929 1.469433 -0.848404  
Al 2.598647 -0.000349 0.000936

**Al<sub>8</sub> (Singlet)**

Al 0.880642 1.009027 -1.275474  
Al -1.238009 2.034584 -1.238589  
Al 1.267816 -2.023831 1.258288  
Al 1.779382 -1.573257 -1.247251  
Al 1.159157 0.715827 1.251149  
Al -0.905637 -1.021053 -1.249444  
Al -1.135640 -0.707493 1.277807  
Al -1.807622 1.566125 -1.251363

**Al<sub>13</sub> (Doublet)**

Al -0.007693 -0.000344 -0.031465  
Al -0.077392 1.481924 2.184500  
Al -0.071856 -1.479483 2.186722  
Al 0.058527 1.477881 -2.250195  
Al 0.063992 -1.481377 -2.248140  
Al 1.428458 2.306608 0.010682  
Al 1.437007 -2.301757 0.014157  
Al -1.451018 2.300297 -0.079061  
Al -1.442722 -2.306119 -0.075778  
Al 2.321324 0.005081 1.269943  
Al 2.279493 0.002850 -1.499874  
Al -2.292244 -0.003519 1.435114  
Al -2.334914 -0.005403 -1.334290

**Al<sub>14</sub> (Singlet)**

Al -0.001849 2.252713 -1.473218  
Al -2.358920 0.716329 -1.378189  
Al -1.543892 -1.922939 -1.218862  
Al 1.262677 -2.011058 -1.229901  
Al 2.247927 0.568135 -1.383953  
Al -1.435526 1.957165 0.973324  
Al -2.387405 -0.627578 1.112364  
Al -0.153184 -2.303562 1.192035  
Al 2.192568 -0.793608 1.103596  
Al 1.427388 1.849219 0.976001  
Al -0.074539 -0.020261 -0.129740  
Al -0.085233 -0.152158 -2.819609  
Al -0.068335 0.090353 2.573592  
Al 0.093917 4.384873 0.504124

Aluminum hydride clusters

**AlH<sup>+</sup> (Doublet)**

Al 0.026699 0.000000 0.000000  
H 1.653301 0.000000 0.000000

**AlH (Singlet)**

Al 0.001082 0.000000 0.000000  
H 1.678918 0.000000 0.000000

**AlH<sup>-</sup> (Doublet)**

Al -0.017397 0.000000 0.000000  
H 1.697397 0.000000 0.000000

**AlH<sub>2</sub><sup>+</sup> (Singlet)**

Al 0.000000 0.000000 0.000000  
H 1.561000 0.000000 0.000000  
H -1.561000 0.000000 0.000000

**AlH<sub>2</sub> (Doublet)**

Al 0.000000 -0.194964 0.000000  
H 1.383604 0.630988 0.000000  
H -1.383604 0.630988 0.000000

**AlH<sub>2</sub><sup>-</sup> (Singlet)**

Al 0.000000 -0.422300 0.000000  
H 1.250572 0.744656 0.000000  
H -1.250572 0.744656 0.000000

**AlH<sub>3</sub><sup>+</sup> (Doublet)**

Al 0.000181 -0.571063 0.000000  
 H 0.902324 0.848584 0.000000  
 H -0.000016 -2.125989 0.000000  
 H -0.902490 0.848468 0.000000

**AlH<sub>3</sub> (Singlet)**

Al 0.000000 -0.250025 0.000000  
 H 1.379402 0.546453 0.000000  
 H 0.000000 -1.842882 0.000000  
 H -1.379402 0.546453 0.000000

**AlH<sub>3</sub><sup>-</sup> (Doublet)**

Al -0.007485 -0.258617 0.540406  
 H 1.360173 0.531337 0.092647  
 H -0.005088 -1.833279 0.076484  
 H -1.370825 0.531753 0.080516

**Al<sub>2</sub>H<sub>6</sub><sup>+</sup> (Doublet)**

Al -0.007389 -0.747322 -0.532267  
 Al 0.015916 1.840097 -0.353008  
 H 0.017210 0.465701 0.712390  
 H -0.003385 0.625654 -1.597811  
 H 1.419212 2.651021 -0.309692  
 H -1.377748 2.665776 -0.283868  
 H -1.414328 -1.552673 -0.575228  
 H 1.377980 -1.586576 -0.602214

**Al<sub>2</sub>H<sub>6</sub> (Singlet)**

Al -0.008612 -0.764507 -0.533357  
 Al 0.015523 1.854926 -0.352069  
 H 0.013860 0.465445 0.710738  
 H -0.006669 0.624971 -1.596166  
 H 1.444743 2.537046 -0.317718  
 H -1.401103 2.561026 -0.290870  
 H -1.438055 -1.446164 -0.567672  
 H 1.407782 -1.471067 -0.594585

**Al<sub>2</sub>H<sub>6</sub><sup>-</sup> (Doublet)**

Al -0.004280 -0.783687 -0.242283  
 Al 0.012769 2.352538 -1.131828  
 H -0.002830 -0.332281 1.312469  
 H -0.004273 0.640744 -1.248383  
 H 1.398523 2.750117 -0.385665  
 H -1.360939 2.776256 -0.377740  
 H -1.367198 -1.518963 -0.733252  
 H 1.355697 -1.523043 -0.735017

**Al<sub>4</sub>H<sub>6</sub><sup>+</sup> (Doublet)**

Al -4.692365 -1.006836 -0.479769  
 Al -4.012043 1.229307 0.822980  
 Al -6.579291 0.645991 1.028610  
 Al -5.816440 1.162100 -1.483494  
 H -7.182830 1.330085 -0.439070  
 H -7.791773 0.322625 1.982115  
 H -4.468520 -2.563223 -0.598718  
 H -6.010155 2.095932 -2.739188  
 H -3.366850 -0.312874 0.385529  
 H -2.830855 2.179601 1.253804

**Al<sub>4</sub>H<sub>6</sub> (Singlet)**

Al -4.801576 -1.004506 -0.348576  
 Al -4.035227 1.283491 0.666217  
 Al -6.551870 0.495072 0.966316  
 Al -5.711591 1.259496 -1.390734  
 H -7.155776 1.317536 -0.433838  
 H -7.797478 0.469120 1.961057  
 H -4.353261 -2.499007 -0.674675  
 H -6.123468 1.995928 -2.743336  
 H -3.394705 -0.301337 0.380661  
 H -2.826172 2.066914 1.349706

**Al<sub>4</sub>H<sub>6</sub><sup>-</sup> (Doublet)**

Al -4.871796 -1.020800 -0.378225  
 Al -4.079226 1.348867 0.671221  
 Al -6.509274 0.456397 1.021079  
 Al -5.640295 1.248582 -1.421290  
 H -7.114791 1.298472 -0.425015  
 H -7.801211 0.457705 1.993313  
 H -4.369214 -2.525923 -0.688913  
 H -6.105656 2.004634 -2.772715  
 H -3.436040 -0.283255 0.371645  
 H -2.823620 2.098025 1.361698

**Al<sub>6</sub>H<sub>2</sub><sup>+</sup> (Doublet)**

Al 0.099788 1.963888 0.046551  
 Al 1.393639 0.017144 1.384797  
 Al -0.098886 -1.965332 0.060565  
 Al -1.461079 -0.082382 -1.287844  
 Al 1.424277 0.075440 -1.330447  
 Al -1.350827 -0.008235 1.426205  
 H -0.123463 1.135719 -1.763297  
 H 0.073758 -1.145764 -1.760059

**Al<sub>6</sub>H<sub>2</sub> (Singlet)**

Al 0.018885 1.922595 0.014981  
 Al 1.390921 0.009543 1.355050  
 Al 0.033519 -1.921118 0.026555  
 Al 1.489703 0.002413 -1.243601  
 Al -1.424611 -0.008685 -1.264396  
 Al -1.367611 -0.000308 1.331232  
 H 0.032023 1.121797 -1.760071  
 H 0.038928 -1.130287 -1.754428

**Al<sub>6</sub>H<sub>2</sub><sup>-</sup> (Doublet)**

Al -1.481928 -0.040218 1.349283  
 Al -1.483648 -0.015532 -1.349929  
 Al 1.483648 -0.015532 -1.349929  
 Al 1.481928 -0.040218 1.349283  
 Al 0.000000 -1.829348 -0.016879  
 Al 0.000000 1.877161 0.015287  
 H 0.000000 0.997888 1.814395  
 H 0.000000 1.026622 -1.799448

**Al<sub>7</sub>H<sup>+</sup> (Doublet)**

Al 0.545485 -0.162194 1.750468  
 Al -1.465494 1.348075 0.778748  
 Al -1.598245 0.050942 -1.585558  
 Al 0.566517 -1.392972 -0.805289  
 Al -1.597437 -1.349097 0.838220  
 Al 0.543727 1.433805 -1.013348  
 Al 2.612008 -0.001021 -0.001987  
 H 4.193223 0.072463 0.040979

**Al<sub>7</sub>H (Singlet)**

Al 0.534501 0.000078 1.719437  
 Al -1.493218 1.359591 0.784906  
 Al -1.493235 0.000122 -1.569652  
 Al 0.534779 -1.487202 -0.858871  
 Al -1.492993 -1.359757 0.784724  
 Al 0.534746 1.487338 -0.858701  
 Al 2.537578 -0.000099 0.000395  
 H 4.137624 -0.000070 -0.000004

**Al<sub>7</sub>H<sup>-</sup> (Doublet)**

Al 0.616465 -0.028670 1.822027  
 Al -1.420419 1.334334 0.793622  
 Al -1.659268 -0.002461 -1.709872  
 Al 0.509444 -1.381817 -0.892574  
 Al -1.453654 -1.322076 0.773379  
 Al 0.509889 1.380390 -0.909819  
 Al 2.541173 0.003666 0.129571  
 H 4.156153 0.016631 -0.004102

**Al<sub>7</sub>H<sub>3</sub><sup>+</sup> (Doublet)**

Al -0.695014 1.549518 0.005899  
 Al 1.443612 0.957036 1.455652  
 Al 1.704471 -1.354582 -0.004148  
 Al -0.436041 -0.806122 -1.543499  
 Al 1.450944 0.974597 -1.437550  
 Al -0.440475 -0.827709 1.532478  
 Al -2.624430 -0.245188 -0.003579  
 H -4.186185 -0.488553 -0.005557  
 H 2.898891 -2.388751 -0.016804  
 H -2.378973 1.582971 0.012658

**Al<sub>7</sub>H<sub>3</sub> (Singlet)**

Al -0.685305 1.631517 0.007210  
 Al 1.385548 0.964293 1.383029  
 Al 1.615984 -1.466047 -0.007431  
 Al -0.438813 -0.878188 -1.453884  
 Al 1.386969 0.976954 -1.371681  
 Al -0.438940 -0.893878 1.446926  
 Al -2.552229 -0.246943 -0.001131  
 H -4.134300 -0.442570 -0.002547  
 H 2.966923 -2.303761 -0.012060  
 H -2.369038 1.611841 0.007122

**Al<sub>7</sub>H<sub>3</sub><sup>-</sup> (Doublet)**

Al -0.488885 -0.615327 -1.519286  
 Al 1.632638 0.942295 -1.442208  
 Al 1.482384 0.830170 1.279902  
 Al -0.568639 -0.738961 1.649686  
 Al 1.463298 -1.469374 0.001404  
 Al -0.655925 1.621976 -0.011223  
 Al -2.538446 -0.428229 0.099968  
 H -4.143626 -0.553580 -0.046104  
 H -1.321813 3.086393 -0.021015  
 H 2.164196 -2.916790 0.008280

**Al<sub>8</sub>H<sub>4</sub><sup>+</sup> (Doublet)**

Al 0.555344 1.259245 -1.239140  
 Al -0.532069 2.203509 1.017446  
 Al 0.532116 -2.204308 1.018011  
 Al 2.085705 -0.889558 -1.016960  
 Al 1.335903 0.341505 1.239276  
 Al -0.555857 -1.260488 -1.240529  
 Al -1.337068 -0.341737 1.240431  
 Al -2.086142 0.890086 -1.017067  
 H -3.413283 1.468056 -1.658459  
 H 3.413439 -1.465733 -1.657874  
 H -0.880575 3.608813 1.657374  
 H 0.882483 -3.609389 1.658582

**Al<sub>8</sub>H<sub>4</sub> (Singlet)**

Al 0.535374 1.234390 -1.208024  
 Al -0.541877 2.189181 1.000187  
 Al 0.541360 -2.188174 0.999598  
 Al 2.070298 -0.897473 -0.999697  
 Al 1.307451 0.325663 1.207523  
 Al -0.534688 -1.233122 -1.207136  
 Al -1.306071 -0.325513 1.206822  
 Al -2.069625 0.896593 -0.999443  
 H -3.412027 1.416309 -1.687215  
 H 3.412077 -1.419161 -1.687946  
 H -0.834039 3.598733 1.689023  
 H 0.831768 -3.597425 1.687398

**Al<sub>8</sub>H<sub>4</sub><sup>-</sup> (Doublet)**

Al 0.581641 1.211333 -1.228018  
 Al -0.656812 2.213558 0.925413  
 Al 0.656606 -2.213846 0.925746  
 Al 2.074873 -1.014686 -0.925651  
 Al 1.292605 0.374888 1.229303  
 Al -0.581931 -1.211307 -1.228235  
 Al -1.292570 -0.374583 1.229104  
 Al -2.074588 1.014851 -0.925321  
 H -3.424344 1.336513 -1.747086  
 H 3.424827 -1.336229 -1.747619  
 H -0.751599 3.598172 1.746446  
 H 0.751290 -3.598661 1.747009

**Al<sub>13</sub>H<sup>+</sup> (Doublet)**

Al 0.052675 -0.000465 -0.021373  
 Al -0.113992 1.403957 2.213264  
 Al -0.098325 -1.407101 2.212047  
 Al 0.068175 1.719506 -2.113028  
 Al 0.054532 -1.721608 -2.112939  
 Al 1.414074 2.365478 0.162199  
 Al 1.420844 -2.360449 0.150202  
 Al -1.506304 2.308980 0.049253  
 Al -1.507364 -2.307568 0.059951  
 Al 2.503021 0.004448 0.982759  
 Al 2.205932 -0.005943 -1.721425  
 Al -2.442240 0.000162 1.210725  
 Al -2.081871 0.002684 -1.503425  
 H 0.030848 -0.002081 3.318391

**Al<sub>13</sub>H (Singlet)**

Al 0.000705 0.000569 -0.021098  
 Al -0.000487 1.414313 2.197374  
 Al -0.000489 -1.414172 2.196720  
 Al -0.000055 1.548479 -2.181749  
 Al -0.000053 -1.548237 -2.181263  
 Al 1.460469 2.289780 0.038385  
 Al 1.459614 -2.289466 0.038211  
 Al -1.460835 2.289347 0.038031  
 Al -1.459987 -2.289037 0.037855  
 Al 2.386783 -0.000350 1.242829  
 Al 2.221499 -0.000299 -1.533801  
 Al -2.386474 -0.000353 1.242539  
 Al -2.221056 -0.000297 -1.533580  
 H 0.000369 -0.000278 3.306146

**Al<sub>13</sub>H<sup>-</sup> (Doublet)**

Al -0.000421 -0.001153 -0.020938  
 Al 0.123648 1.413628 2.187319  
 Al -0.130478 -1.414448 2.188358  
 Al -0.054091 1.564581 -2.145333  
 Al 0.058128 -1.566512 -2.145029  
 Al 1.559339 2.455636 -0.019214  
 Al 1.437045 -2.279105 0.118162  
 Al -1.438153 2.279622 0.113060  
 Al -1.561824 -2.454088 -0.023239  
 Al 2.384453 0.022435 1.210033  
 Al 2.205165 0.033099 -1.540295  
 Al -2.385244 -0.020220 1.209402  
 Al -2.204012 -0.032925 -1.541690  
 H 0.006447 -0.000552 3.296003

**Al<sub>14</sub>H<sub>2</sub><sup>+</sup> (Doublet)**

Al -0.039467 2.251096 -1.679288  
 Al -2.366556 0.749867 -1.378000  
 Al -1.551588 -1.896108 -1.222154  
 Al 1.321786 -1.909445 -1.193815  
 Al 2.264312 0.641435 -1.391375  
 Al -1.632295 1.921185 1.039756  
 Al -2.397980 -0.646749 1.150135  
 Al -0.107322 -2.201629 1.245314  
 Al 2.217571 -0.772760 1.123123  
 Al 1.563921 1.826458 1.047219  
 Al -0.090814 0.070291 -0.128345  
 Al -0.053868 -0.162252 -2.851488  
 Al -0.072144 0.163439 2.602400  
 Al 0.034896 3.900556 0.410803  
 H 0.137599 5.462053 0.662694  
 H -2.340391 -3.133123 -1.835336

**Al<sub>14</sub>H<sub>2</sub> (Singlet)**

Al -0.084876 2.258811 -1.592205  
 Al -2.363997 0.690765 -1.381254  
 Al -1.596939 -1.921017 -1.252074  
 Al 1.290948 -1.923118 -1.193073  
 Al 2.206218 0.653296 -1.403267  
 Al -1.576371 1.949463 0.963754  
 Al -2.393055 -0.642979 1.091482  
 Al -0.121005 -2.213711 1.212318  
 Al 2.197670 -0.754852 1.114875  
 Al 1.592738 1.873569 1.074108  
 Al -0.055025 0.083677 -0.106270  
 Al -0.103711 -0.170088 -2.818180  
 Al -0.114389 0.173682 2.560747  
 Al 0.237387 3.930126 0.530606  
 H 0.070172 5.514071 0.624300  
 H -2.298107 -3.237379 -1.824222

**Al<sub>14</sub>H<sub>2</sub><sup>-</sup> (Doublet)**

Al 0.017241 2.287053 -1.570740  
 Al -2.320078 0.732883 -1.352786  
 Al -1.592920 -1.918610 -1.248272  
 Al 1.318143 -1.997461 -1.262546  
 Al 2.208986 0.610706 -1.361985  
 Al -1.512696 1.970477 1.042804  
 Al -2.367312 -0.618120 1.105567  
 Al -0.156804 -2.303433 1.256160  
 Al 2.174086 -0.791739 1.094332  
 Al 1.558163 1.917208 1.061643  
 Al -0.043147 0.048168 -0.103395  
 Al -0.081337 -0.145868 -2.798521  
 Al -0.073926 0.138761 2.535741  
 Al 0.119652 3.974487 0.466536  
 H -0.016781 5.569159 0.581631  
 H -2.343608 -3.209357 -1.844527
